# Supplementary material for: Glass-transition-induced color-changing resins containing layered polydiacetylene
Source: Royal Society of Chemistry journal article supplement (doi:10.1039/c9cc05303d), 2019-01-01
Supplement: c9cc05303d1.pdf [file c9cc05303d1.pdf]

## Electronic Supplementary Information (ESI)

### Glass-transition-induced color-changing resin containing layered polydiacetylene

Shuhei Ishioka,<sup>a</sup> Kei Watanabe,<sup>a</sup> Hiroaki Imai,<sup>a</sup> Yu-Jen Tseng,<sup>b</sup> Chi-How Peng<sup>b</sup> and Yuya Oaki<sup>\*,a</sup>

<sup>a</sup>Department of Applied Chemistry, Faculty of Science and Technology, Keio University, 3-14-1 Hiyoshi, Kohoku-ku, Yokohama 223-8522, Japan.

<sup>b</sup>Department of Chemistry, National Tsing Hua University, Hsinchu 30013, Taiwan.

\*E-mail: oakiyuya@apple.keio.ac.jp

## Contents

|                                                                                       |        |
|---------------------------------------------------------------------------------------|--------|
| Experimental methods                                                                  | P. S2  |
| FT-IR spectra of the PSt/PDA composites (Fig. S1)                                     | P. S3  |
| Summary of $T_g$ and $T_{DSC}$ for the eight different samples (Fig. S2 and Table S1) | P. S4  |
| DSC thermograms of pure PSt and PDA (Fig. S3)                                         | P. S6  |
| GPC analysis of PSt in the composite (Fig. S4 and Table S2)                           | P. S7  |
| PSt/PDA composites prepared by the different method (Fig. S5)                         | P. S9  |
| Effects of the heating rate on the color-change behavior (Fig. S6)                    | P. S11 |

## Experimental methods

**Synthesis of the PSt/PDA resin.** All the reagents were used as purchased without purification. About 160 mg of 10,12-pentacosadiynoic acid (PCDA, TCI, 97.0 %) monomer was dissolved in 1.6 g of styrene (St, Kanto, 99.0 %) monomer liquid. After filtration of the solution to remove the polymerized PCDA, 0.38 cm<sup>3</sup> of the precursor solution was poured into a glass vessel 2 cm<sup>3</sup> in volume. Then, 2,2'-azobis(isobutyronitrile) (AIBN, TCI, 98.0 %) as an initiator was dissolved into the solution. The concentration of AIBN ( $C_{\text{AIBN}}$ ) was changed at 0.1, 0.2, and 1.0 mol%. The St containing PCDA and AIBN, typically 0.11 cm<sup>3</sup>, was transferred to a sample tube 2 cm<sup>3</sup> in volume. The polymerization of St was performed in a drying oven at 60 °C for 48 h. Then, PCDA monomer in the solid PSt matrix was polymerized with irradiation of LED-UV light (365 nm) to both sides for each 30 min. The cylindrical bulk composite of PSt/PDA about 5 mm in width and 3 mm in height was prepared by trimming. The reference PSt samples were prepared by the same procedure without addition of PCDA.

**Characterization of the stimuli-responsive color-change properties.** The cylindrical shape of the PSt/PDA composites was heated on a temperature-controlled stage in the range 25–80 °C. The photographs of the sample were taken after heating and keeping at certain temperature for 5 min. The R, G, and B values were estimated from the photographs using Image J software. Then, the RGB values were converted to  $x$ ,  $y$ , and  $z$  values using the following (eq. S1) according to ITU-R BT. 709, an international standard.<sup>52</sup> The structure changes with heating were analyzed by differential scanning calorimetry (DSC, Shimadzu, DSC-60plus) under nitrogen atmosphere at the scan rate 5 °C min<sup>-1</sup>. Alumina was used as the reference.

$$\begin{bmatrix} x \\ y \\ z \end{bmatrix} = \begin{bmatrix} 0.4124 & 0.3576 & 0.1805 \\ 0.2126 & 0.7152 & 0.0722 \\ 0.0193 & 0.1192 & 0.9505 \end{bmatrix} \begin{bmatrix} R \\ G \\ B \end{bmatrix} \dots \text{(eq. S1)}$$

**Structure characterization.** The state of the carboxy group was analyzed by Fourier-transform infrared spectroscopy (FT-IR, Jasco, FT/IR-4200). The sample was prepared by mixing with KBr. UV-Vis spectra were measured by a spectrophotometer (Jasco, V-670). The SE and BSE images of PDA in PSt was observed by scanning electron microscopy (SEM, Carl-Zeiss, Merlin VP Compact) operated at 1.5 kV. The SE and BSE images were obtained. The treated color of the BSE images was prepared by a software for microscopy image (Gatan, Digital Micrograph).

### FT-IR spectra of the PSt/PDA composites

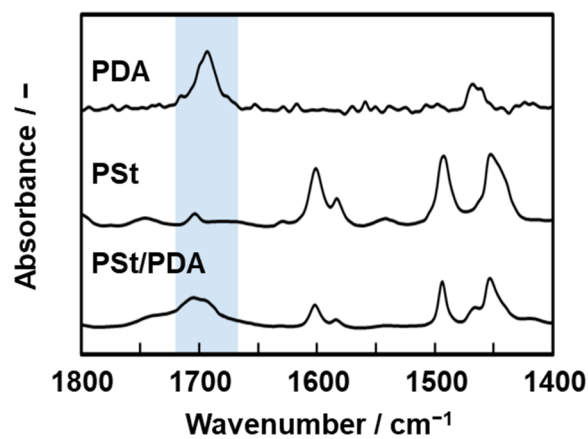

**Fig. S1.** FT-IR spectra of pure PDA, PSt, and PSt/PDA.

FT-IR spectrum of PSt/PDA showed the absorption around 1700 cm<sup>-1</sup> corresponding to the dimerized carboxy group characteristic to the layered PDA.<sup>50</sup>

## Summary of $T_x$ and $T_{DSC}$ for the eight different samples

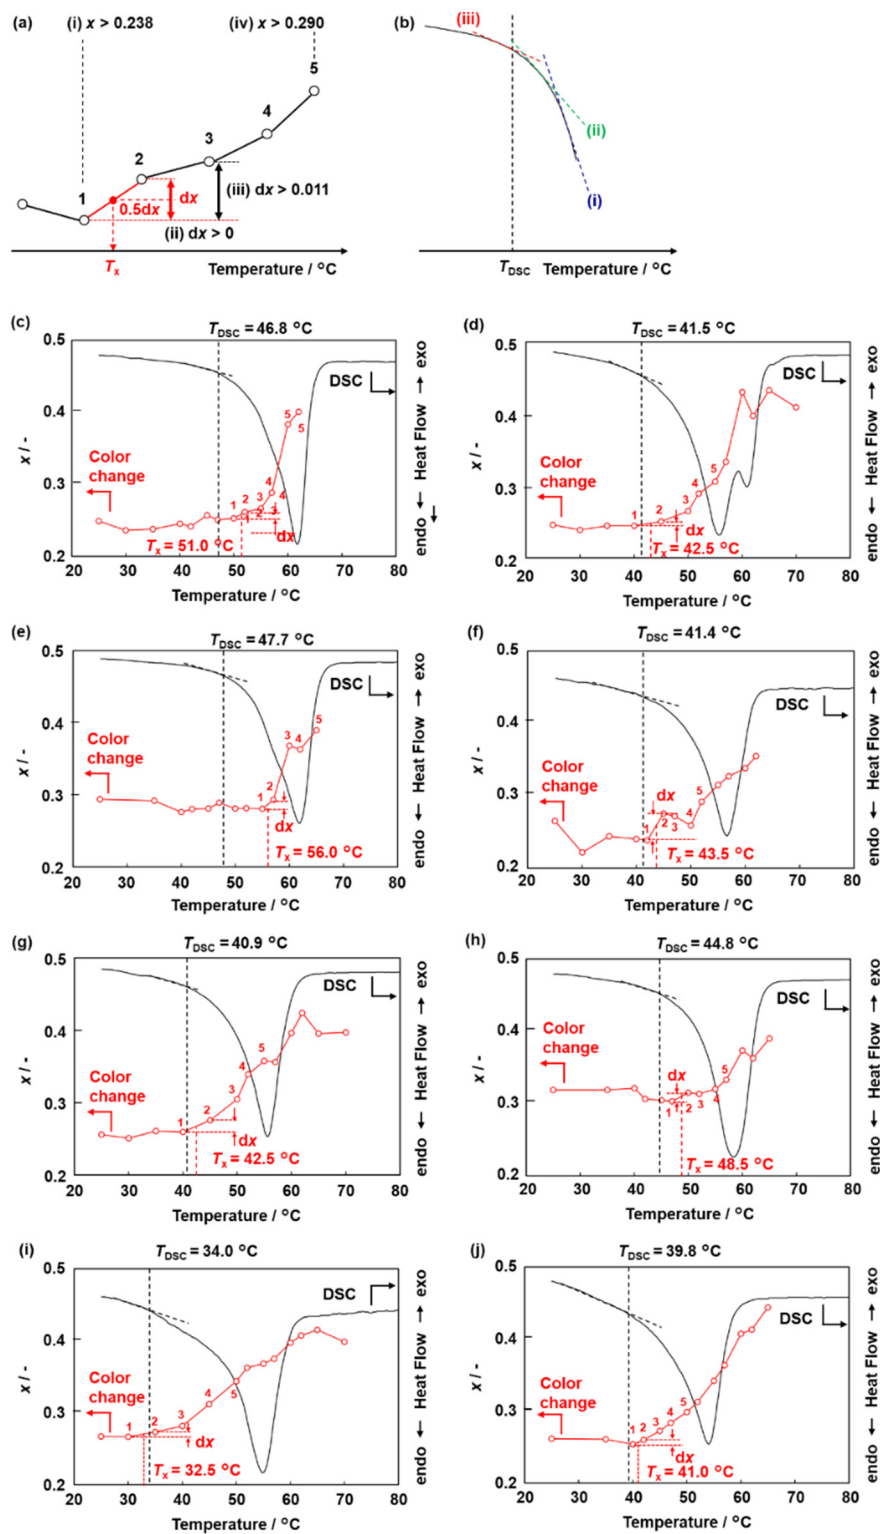

**Fig. S2.** Relationship between  $T$  and  $x$  (red) and DSC thermogram (black) of the eight different samples. (a,b) Definition of  $T_x$  and  $T_{DSC}$ , respectively. (c–e)  $CAIBN = 0.1$  mol%. (f–h)

$C_{\text{AIBN}} = 0.2 \text{ mol\%}$ . (i,j)  $C_{\text{AIBN}} = 1.0 \text{ mol\%}$ .

The  $T_x$  and  $T_{\text{DSC}}$  were defined as follows. The five plots (1-5) were assigned by the following rules (i)-(iv) on the relationship between temperature and  $x$  (Fig. S2a). (i) The  $x$  value of the plot 1 is larger than 0.238 ( $x > 0.28$ ). (ii) An increase in the  $x$  value from the plots 1 to 2 ( $dx$ ) is positive ( $dx > 0$ ). (iii) An increase in the  $x$  value from the plots 1 to 3 ( $dx$ ) is larger than 0.011 ( $dx > 0.011$ ). (iv) The  $x$  value of the plot 5 is larger than 0.290 ( $x > 0.290$ ). Then, the temperature to achieve  $0.5dx$  between the plots 1 and 2 was defined as  $T_x$ . The DSC thermograms show the large endothermic peak corresponding to the deformation of layered PDA at temperature higher than  $50 \text{ }^\circ\text{C}$  (Fig. S2b). The slope to this large peak is defined as the slope (i). Prior to the slope (i), the two different slopes are drawn at the lower temperature side (the slopes (ii) and (iii) in Fig. S2b). The slope (iii) is used to estimate the  $T_{\text{DSC}}$ .

**Table S1** Summary of  $T_x$  and  $T_{\text{DSC}}$  estimated from Fig. S2.

| Entry | $C_{\text{AIBN}} / \text{mol\%}$ | $T_x / ^\circ\text{C}$ | $T_{\text{DSC}} / ^\circ\text{C}$ |
|-------|----------------------------------|------------------------|-----------------------------------|
| 1     | 0.1                              | 51.0                   | 46.84                             |
| 2     | 0.1                              | 45.5                   | 41.50                             |
| 3     | 0.1                              | 56.0                   | 47.69                             |
| 4     | 0.2                              | 43.5                   | 41.43                             |
| 5     | 0.2                              | 42.5                   | 40.90                             |
| 6     | 0.2                              | 48.5                   | 44.79                             |
| 7     | 1.0                              | 32.5                   | 33.99                             |
| 8     | 1.0                              | 41.0                   | 39.75                             |

The  $T_{\text{DSC}}$  was estimated from the DSC thermogram (the black curves in Fig. S2). The relationship between  $T$  and  $x$  provided the  $T_x$  (the red curves in Fig. S2). The data were summarized in Table S1. Relationship between  $T_{\text{DSC}}$  and  $T_x$  in Fig. 4d were prepared on the basis of Table S1. The  $T_{\text{DSC}}$  and  $T_x$  were not linearly varied with changes of  $C_{\text{AIBN}}$ . In the present work, the polymerization of PSt was performed in a small scale, namely  $0.11 \text{ cm}^3$  in  $2 \text{ cm}^3$  sample tube, to reduce consumption of PCDA monomer. The actual polymerization conditions were slightly changed in each batch because of evaporation of St, even though the initial conditions are the same. The amount of the evaporating St can be ignored in the larger-scale polymerization setup

### DSC thermograms of pure PSt and PDA

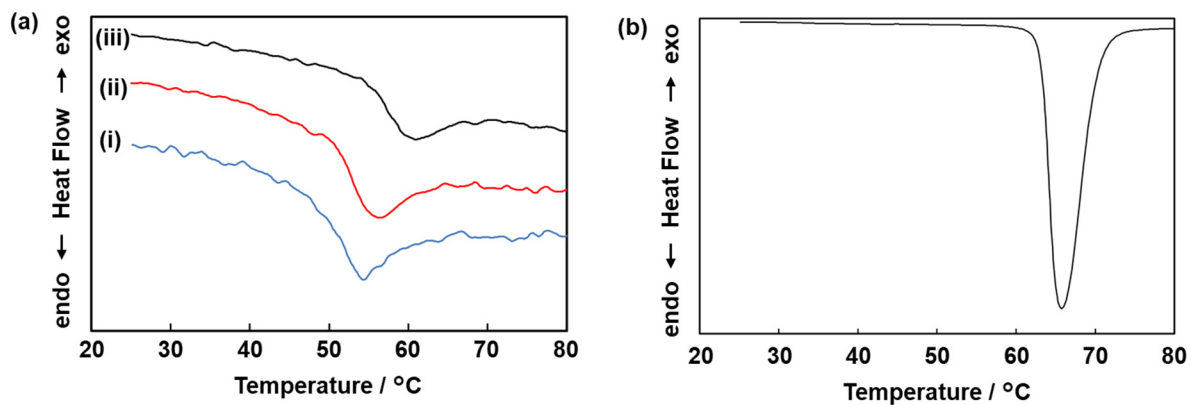

**Fig. S3.** DSC thermograms of pure PSt (a) with  $C_{AIBN} = 0.1$  (i), 0.5 (ii), and 1.0 mol% (iii) and PDA (b).

Pure PSt showed the baseline shift and endothermic peak corresponding to  $T_g$  around 55 °C (Fig. S3a). Pure PDA showed the endothermic peak around 65 °C (Fig. S3b). This behavior is ascribed to deformation of the layered structure of PDA.

## GPC analysis of PSt in the composite

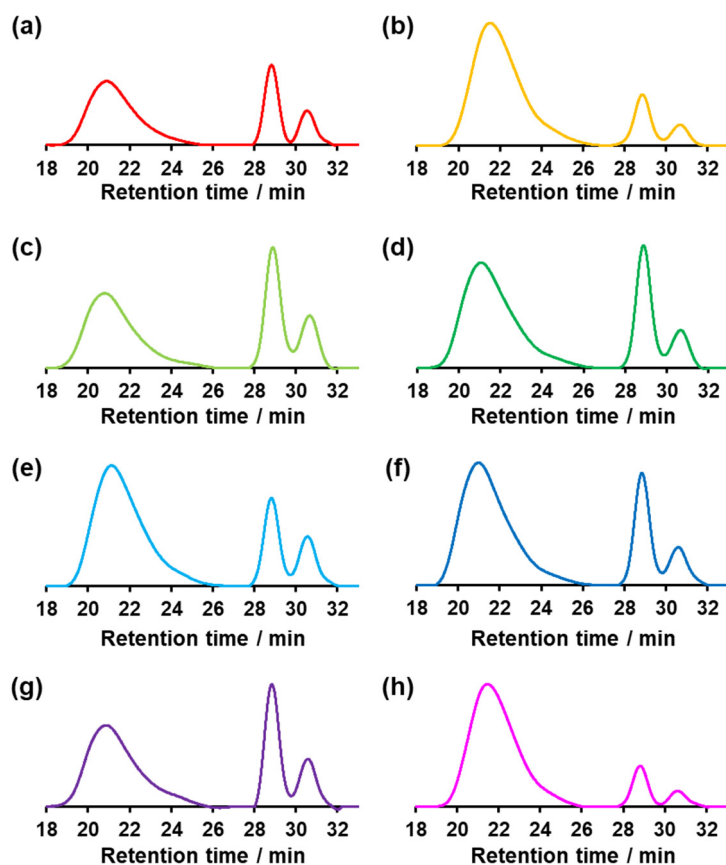

**Fig. S4.** GPC traces of the PSt in the composites. The panels (a)–(h) correspond to the samples listed the entries 1–8 in Table S1, respectively.

**Table S2.** Summary of the molecular weight (retention time) and poly dispersity index (PDI) for the 1st, 2nd, and 3rd peaks of the 8 samples estimated from GPC measurement in Fig. S4.

| Entry | 1st peak <sup>a</sup> | PDI  | 2nd peak <sup>a,b</sup> | PDI  | 3rd peak <sup>a,b</sup> | PDI  |
|-------|-----------------------|------|-------------------------|------|-------------------------|------|
| 1     | 72805 (20.7)          | 1.52 | 835 (28.8)              | 1.02 | 408 (30.5)              | 1.01 |
| 2     | 32408 (21.5)          | 1.93 | 829 (28.9)              | 1.03 | 384 (30.7)              | 1.01 |
| 3     | 64268 (20.8)          | 1.79 | 806 (28.9)              | 1.02 | 385 (30.7)              | 1.01 |
| 4     | 38744 (21.1)          | 2.22 | 811 (28.9)              | 1.02 | 387 (30.7)              | 1.01 |
| 5     | 47836 (21.1)          | 1.78 | 840 (28.8)              | 1.02 | 398 (30.6)              | 1.02 |
| 6     | 41697 (21.0)          | 2.22 | 826 (28.8)              | 1.02 | 388 (30.6)              | 1.02 |
| 7     | 54669 (20.9)          | 1.95 | 827 (28.9)              | 1.02 | 391 (30.6)              | 1.02 |
| 8     | 34188 (21.5)          | 1.91 | 845 (28.8)              | 1.02 | 380 (30.6)              | 1.02 |

<sup>a</sup>The retention time is displayed in the bracket. <sup>b</sup>The lower limit of the calibration curve in GPC instrument is 1200. Molecular weight below 1200 may not be accurate.

The PSt/PDA was dissolved in toluene and then the incorporated PDA particles were removed by filtration. The molecular weight of all samples was measured by gel permeation chromatography (GPC), which was carried out by THF eluent using the Ultimate 3000 liquid chromatograph equipped with a 101 refractive index detector and three Shodex columns (Shodex KF-802, KF-803 and KF-804). The signal was collected by DIONEX Shodex RI-101 refractometer (RI) detector and UltiMate 3000 variable wavelength detector operated at 254 nm for the THF system. The calibration was based on narrow linear polystyrene standard ranging in molecular weight from  $1.20 \times 10^3 \text{ g mol}^{-1}$  to  $1.41 \times 10^6 \text{ g mol}^{-1}$  for the THF system.

The GPC traces showed three peaks for all the 8 samples (Fig. S4 and Table S2 in the ESI). The retention time and molecular weight for each sample were summarized in Table S2. The 2nd and 3rd peaks at the longer retention time indicate the presence of low-molecular-weight PSt in the composite. Since the lower limit of the calibration curve in GPC instrument is 1200, molecular weight below 1200 may not be accurate. These results indicate that the low-molecular weight of PSt in the composite contributes to induce molecular motion with glass transition at lower temperature.



## PSt/PDA composites prepared by the different method

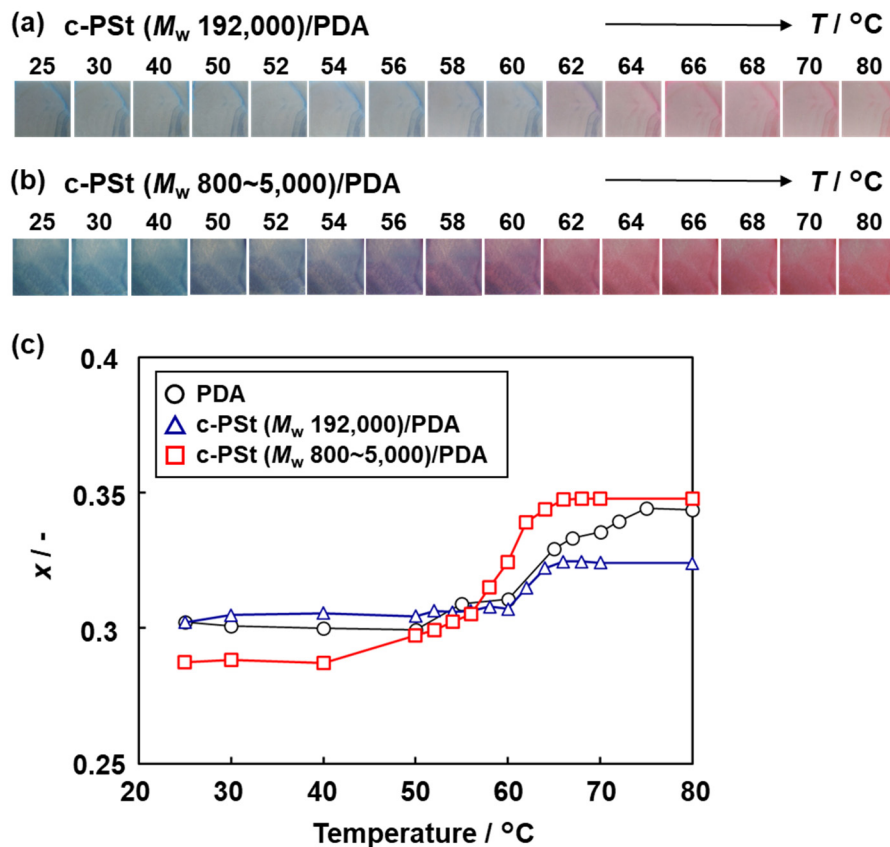

**Fig. S5.** Temperature-responsive color-change properties of PSt/PDA composites prepared by the different method as the reference. (a, b) Photographs of the c-PSt ( $M_w$  192,000)/PDA (a) and c-PSt ( $M_w$  800~5,000)/PDA (b) the samples on a glass substrate with heating. (c) Relationship between temperature and  $x$  value of the reference samples.

The reference composites were prepared using two commercial PSt (Aldrich, average  $M_w$  192,000 and Polyscience,  $M_w$  800~5,000) (c-PSt ( $M_w$  192,000) and c-PSt ( $M_w$  800~5,000)). The precursor solution containing 50 mg PCDA and 280 mg PSt was prepared with 20 cm<sup>3</sup> of toluene. The precursor solution, typically 0.5 cm<sup>3</sup>, was casted on a glass substrate. After evaporation of toluene, PSt/PCDA film was covered on the glass substrate. The films of c-PSt ( $M_w$  192,000)/PDA and c-PSt ( $M_w$  800~5,000)/PDA were obtained by topochemical polymerization with irradiation of UV light. As the reference, the PDA deposited on the glass substrate was also prepared without addition of commercial PSt in the same procedure. This

method provided not three-dimensional (3D) shape but the two-dimensional (2D) casting film on a substrate, whereas the bulk three-dimensional form of resin, as shown in Fig. 2a–c, was obtained by the simultaneous polymerization and crystallization methods.

The c-PSt ( $M_w$  192,000)/PDA and c-PSt ( $M_w$  800~5,000)/PDA showed the different color-change behavior (Fig. S5a,b). The c-PSt ( $M_w$  192,000)/PDA and PDA on the glass substrate showed the similar color-change behavior with heating (the circles and triangles in Fig. S5c). An increase in the  $x$  value was started with heating after 50 °C. The c-PSt ( $M_w$  192,000) with higher  $M_w$  and  $T_g$  has no effects on the color-change behavior of PDA. In contrast, the  $x$  value of the c-PSt ( $M_w$  800~5,000)/PDA increased with heating after 40 °C (the circles in Fig. S5c). The color change is induced by c-PSt ( $M_w$  800~5,000) with lower  $M_w$  and  $T_g$ . These results support the color change is induced by molecular motion of PSt with glass transition.

## Effects of the heating rate on the color-change behavior

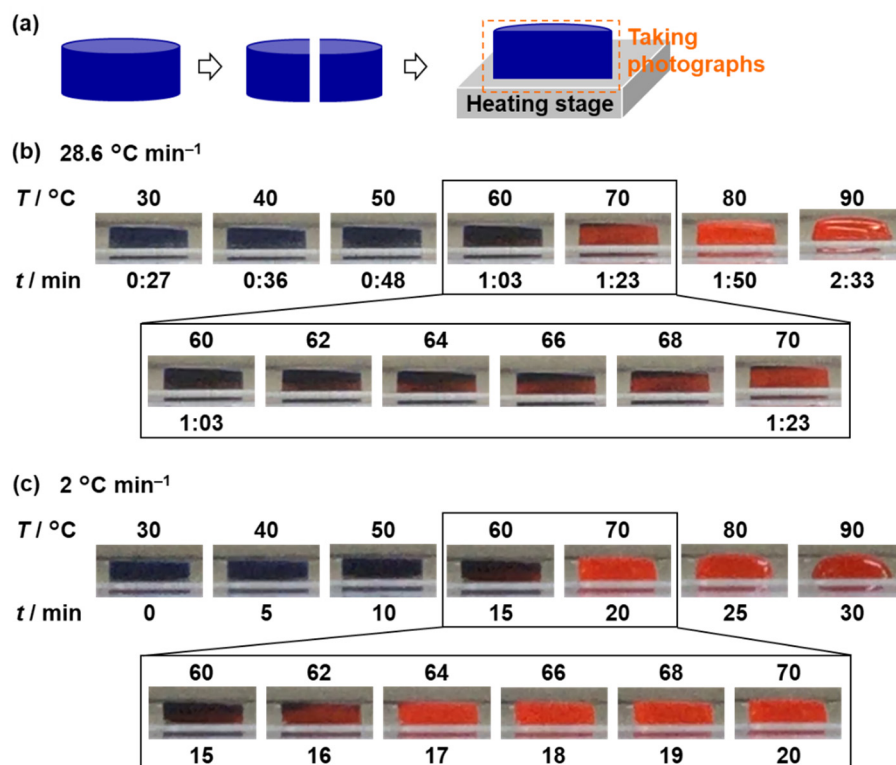

**Fig. S6.** Color-change behavior of the PSt/PDA sample with different heating rate. (a) Schematic illustration of the experimental setup. (b,c) Photographs of the samples with heating at  $28.6\text{ }^{\circ}\text{C min}^{-1}$  (b) and  $2\text{ }^{\circ}\text{C min}^{-1}$  (c).

The same sample was divided into two pieces to study the color-change behavior with different heating rate (Fig. S6a). The separated samples were set on a temperature-controlled stage. The sample was heated at  $28.6\text{ }^{\circ}\text{C min}^{-1}$  and  $2\text{ }^{\circ}\text{C min}^{-1}$  (Fig. S6b,c). The photographs of the cross-sectional view were taken at specific temperature. The higher heating rate showed the complete color-change to red at the higher temperature around  $70\text{ }^{\circ}\text{C}$  (Fig. S6b), whereas the complete color change was achieved around  $64\text{ }^{\circ}\text{C}$  at the lower heating rate (Fig. S6c). This difference in the color-change temperature supports that molecular motion with glass transition of PSt has effects on the color change of PDA.
